# Supplementary material for: Generation of raptor diversity in Europe: linking speciation with climate changes and the ability to migrate
Source: PeerJ journal article supplement (doi:10.7717/peerj.14505), 2022-12-08
Supplement: sub_mat_staff_KT.pdf [file sub_mat_staff_KT.pdf]

## Supplementary Material

### Generation of raptor diversity in Europe: linking speciation with climate changes and the ability to migrate

Juan J. Negro<sup>1</sup>, Eduardo Rodríguez-Rodríguez<sup>2</sup>, Airam Rodríguez<sup>3,4,5</sup>, Keith Bildstein<sup>6</sup>

<sup>1</sup>Department of Evolutionary Ecology, Estación Biológica de Doñana-CSIC, Sevilla, Spain.

<sup>2</sup>Department of Integrated Sciences, Faculty of Experimental Sciences, University of Huelva, Huelva, Spain.

<sup>3</sup>Grupo de Ornitología e Historia Natural de las islas Canarias (GOHNIC), Buenavista del Norte, Canary Islands, Spain.

<sup>4</sup>Terrestrial Ecology Group (TEG-UAM), Department of Ecology, Universidad Autónoma de Madrid, Madrid, Spain.

<sup>5</sup>Centro de Investigación en Biodiversidad y Cambio Global (CIBC-UAM), Universidad Autónoma de Madrid, Madrid, Spain.

<sup>6</sup>116 Village Drive, Blandon, PA 19510, USA.

#### Content

**Table S1.** Factor loadings and importance of the components of the principal components analysis (PCA) on fourteen morphometric variables.

**Table S2.** Trophic niche variables used in the analysis of trophic niche.

**Code.** R scripts for the cluster dendrogram and K-means analysis.

**Figure S1.** Groups resulting from the K-means cluster analysis with 16 centers. The groups are composed by the same species as in Fig. 1 (main text). Cluster stability (measured as average Jaccard distances) is also included after species names.

**Figure S2.** Pairwise correlations of the first principal component (body size index) and seven morphometric variables (i.e. those representing the lowest values of the ranges of each morphometric). Black numbers indicate Pearson correlation coefficients and red stars indicate if the correlation is highly significant (\*\*\*) ( $p < 0.001$ ).

**Figure S3.** European raptors grouped according to both trophic niche and phylogenetic relationships to show morphological and plumage similarities.

**Table S1**

|                                 | PC1    | PC2    | PC3    | PC4    | PC5    |
|---------------------------------|--------|--------|--------|--------|--------|
| <i>Factor loadings</i>          |        |        |        |        |        |
| Size_HBW1 <sup>a</sup>          | -0.276 | 0.136  | -0.029 | 0.311  | -0.084 |
| Size_HBW2 <sup>a</sup>          | -0.275 | 0.088  | -0.096 | 0.190  | 0.499  |
| Wingspan_HBW1 <sup>a</sup>      | -0.273 | 0.103  | 0.425  | -0.061 | -0.156 |
| Wingspan_HBW2 <sup>a</sup>      | -0.261 | 0.032  | 0.721  | -0.413 | 0.089  |
| Length1 <sup>b</sup>            | -0.278 | 0.050  | -0.024 | 0.241  | -0.181 |
| Length2 <sup>b</sup>            | -0.277 | 0.087  | -0.117 | 0.084  | 0.240  |
| Wingspan1 <sup>b</sup>          | -0.276 | 0.067  | 0.119  | 0.397  | -0.196 |
| Wingspan2 <sup>b</sup>          | -0.276 | 0.076  | 0.090  | 0.341  | 0.216  |
| Tail1 <sup>b</sup>              | -0.253 | 0.429  | -0.249 | -0.215 | -0.465 |
| Tail2 <sup>b</sup>              | -0.249 | 0.437  | -0.345 | -0.477 | 0.202  |
| Weight_M1 <sup>b</sup>          | -0.263 | -0.374 | -0.107 | -0.080 | -0.158 |
| Weight_M2 <sup>b</sup>          | -0.260 | -0.381 | -0.155 | -0.096 | -0.419 |
| Weight_F1 <sup>b</sup>          | -0.263 | -0.349 | -0.146 | -0.233 | 0.239  |
| Weight_F2 <sup>b</sup>          | -0.260 | -0.401 | -0.123 | -0.103 | 0.147  |
| <i>Importance of components</i> |        |        |        |        |        |
| Standard deviation              | 3.563  | 0.891  | 0.472  | 0.314  | 0.252  |
| Proportion of variance          | 0.907  | 0.057  | 0.016  | 0.007  | 0.005  |
| Cumulative proportion           | 0.907  | 0.964  | 0.979  | 0.986  | 0.991  |

**Table S1.** Factor loadings and importance of the components of the principal components analysis (PCA) on 14 morphometric variables. <sup>a</sup> and <sup>b</sup> taken from Del Hoyo et al. (1994) and Ferguson-Lees & Christie (2001), respectively.

**Table S2**

| Species                      | Predator | Scavenger | fish | small birds | large birds | small mammals | Large mammals | insects | herps | Scavenging type | Foraging method               |
|------------------------------|----------|-----------|------|-------------|-------------|---------------|---------------|---------|-------|-----------------|-------------------------------|
| <i>Pandion haliaetus</i>     | yes      | no        | yes  | no          | no          | no            | no            | no      | no    | no              | foraging on water             |
| <i>Haliaeetus albicilla</i>  | yes      | no        | yes  | no          | yes         | no            | yes           | no      | no    | no              | foraging on water             |
| <i>Elanus caeruleus</i>      | yes      | no        | no   | yes         | no          | yes           | no            | yes     | yes   | no              | open foraging                 |
| <i>Circaetus gallicus</i>    | yes      | no        | no   | no          | no          | no            | no            | no      | yes   | no              | perch hunting                 |
| <i>Pernis apivorus</i>       | yes      | no        | no   | no          | no          | no            | no            | yes     | no    | no              | ground hunting                |
| <i>Circus aeruginosus</i>    | yes      | yes       | yes  | yes         | yes         | yes           | no            | no      | no    | small pieces    | foraging over wetlands        |
| <i>Circus pygargus</i>       | yes      | no        | no   | yes         | no          | yes           | no            | yes     | yes   | no              | open foraging close to ground |
| <i>Circus cyaneus</i>        | yes      | no        | no   | yes         | no          | yes           | no            | yes     | yes   | no              | open foraging close to ground |
| <i>Circus macrourus</i>      | yes      | no        | no   | yes         | no          | yes           | no            | yes     | yes   | no              | open foraging close to ground |
| <i>Accipiter gentilis</i>    | yes      | no        | no   | yes         | yes         | yes           | no            | no      | no    | no              | forest ambush                 |
| <i>Accipiter brevipes</i>    | yes      | no        | no   | yes         | yes         | yes           | no            | no      | no    | no              | forest ambush                 |
| <i>Accipiter nisus</i>       | yes      | no        | no   | yes         | yes         | yes           | no            | no      | no    | no              | forest ambush                 |
| <i>Milvus migrans</i>        | yes      | yes       | no   | yes         | no          | yes           | no            | yes     | yes   | small pieces    | open foraging                 |
| <i>Milvus milvus</i>         | yes      | yes       | no   | yes         | no          | yes           | no            | yes     | yes   | small pieces    | open foraging                 |
| <i>Buteo buteo</i>           | yes      | yes       | no   | yes         | yes         | yes           | no            | no      | yes   | small pieces    | perch hunting                 |
| <i>Buteo lagopus</i>         | yes      | yes       | no   | yes         | yes         | yes           | no            | no      | yes   | small pieces    | perch hunting                 |
| <i>Buteo rufinus</i>         | yes      | yes       | no   | yes         | yes         | yes           | no            | no      | yes   | small pieces    | perch hunting                 |
| <i>Hieraetus pennatus</i>    | yes      | no        | no   | no          | yes         | no            | yes           | no      | yes   | no              | open foraging                 |
| <i>Aquila fasciata</i>       | yes      | no        | no   | no          | yes         | no            | yes           | no      | yes   | no              | open foraging                 |
| <i>Aquila chrysaetos</i>     | yes      | yes       | no   | no          | yes         | no            | yes           | no      | yes   | Large pieces    | open foraging                 |
| <i>Aquila adalberti</i>      | yes      | yes       | no   | no          | yes         | no            | yes           | no      | yes   | Large pieces    | open foraging                 |
| <i>Aquila heliaca</i>        | yes      | yes       | no   | no          | yes         | no            | yes           | no      | yes   | Large pieces    | open foraging                 |
| <i>Clanga clanga</i>         | yes      | yes       | no   | no          | yes         | yes           | yes           | no      | yes   | Large pieces    | open foraging                 |
| <i>Clanga pomarina</i>       | yes      | yes       | no   | no          | yes         | yes           | yes           | no      | yes   | Large pieces    | open foraging                 |
| <i>Aegypius monachus</i>     | no       | yes       | no   | no          | no          | no            | no            | no      | no    | Large pieces    | open foraging                 |
| <i>Gyps fulvus</i>           | no       | yes       | no   | no          | no          | no            | no            | no      | no    | Large pieces    | open foraging                 |
| <i>Gypaetus barbatus</i>     | no       | yes       | no   | no          | no          | no            | no            | no      | no    | small pieces    | open foraging                 |
| <i>Neophron percnopterus</i> | no       | yes       | no   | no          | no          | no            | no            | no      | no    | small pieces    | open foraging                 |
| <i>Falco naumanni</i>        | yes      | no        | no   | yes         | no          | yes           | no            | yes     | yes   | no              | open foraging                 |
| <i>Falco vespertinus</i>     | yes      | no        | no   | yes         | no          | yes           | no            | yes     | yes   | no              | open foraging                 |
| <i>Falco tinnunculus</i>     | yes      | no        | no   | yes         | no          | yes           | no            | yes     | yes   | no              | open foraging                 |
| <i>Falco eleonora</i>        | yes      | no        | no   | yes         | yes         | yes           | no            | no      | yes   | no              | perch and aerial hunting      |
| <i>Falco subbuteo</i>        | yes      | no        | no   | yes         | yes         | yes           | no            | no      | yes   | no              | perch and aerial hunting      |
| <i>Falco peregrinus</i>      | yes      | no        | no   | yes         | yes         | yes           | yes           | no      | yes   | no              | perch and aerial hunting      |
| <i>Falco columbarius</i>     | yes      | no        | no   | yes         | yes         | yes           | yes           | no      | yes   | no              | perch and aerial hunting      |
| <i>Falco biarmicus</i>       | yes      | no        | no   | yes         | yes         | yes           | yes           | no      | yes   | no              | perch and aerial hunting      |
| <i>Falco rusticolus</i>      | yes      | no        | no   | yes         | yes         | yes           | yes           | no      | yes   | no              | perch and aerial hunting      |
| <i>Falco cherrug</i>         | yes      | no        | no   | yes         | yes         | yes           | yes           | no      | yes   | no              | perch and aerial hunting      |

**Table S2.** Behavioural and dietary data used to generate trophic niche groups (from Del Hoyo et al. 1994 and Fergusson-Lees and Christie 2001).

## Code

### R scripts

#### ## Upload data

```
library(readxl)
x <- read_excel("TableS2.xlsx")
x <- as.data.frame(x)
```

#### ## Data preparation

```
x[x == "yes"] <- "1"
x[x == "no"] <- "0"
```

```
x$ScavengingSmallPieces <- x$Scavengingtype
x$ScavengingSmallPieces[x$ScavengingSmallPieces == "small pieces"] <- "1"
x$ScavengingSmallPieces[x$ScavengingSmallPieces == "Large pieces"] <- "0"
```

```
x$ScavengingLargePieces <- x$Scavengingtype
x$ScavengingLargePieces[x$ScavengingLargePieces == "small pieces"] <- "0"
x$ScavengingLargePieces[x$ScavengingLargePieces == "Large pieces"] <- "1"
```

```
x$fonwater <- x$Foragingmethod
x$fonwater[x$fonwater != "foraging on water"] <- "0"
x$fonwater[x$fonwater == "foraging on water"] <- "1"
```

```
x$openf <- x$Foragingmethod
x$openf[x$openf != "open foraging"] <- "0"
x$openf[x$openf == "open foraging"] <- "1"
```

```
x$ph <- x$Foragingmethod
x$ph [x$ph != "perch hunting"] <- "0"
x$ph [x$ph == "perch hunting"] <- "1"
```

```
x$gh <- x$Foragingmethod
x$gh [x$gh != "ground hunting"] <- "0"
x$gh [x$gh == "ground hunting"] <- "1"
```

```
x$fowet <- x$Foragingmethod
x$fowet [x$fowet != "foraging over wetlands"] <- "0"
x$fowet [x$fowet == "foraging over wetlands"] <- "1"
```

```
x$ofcg <- x$Foragingmethod
x$ofcg [x$ofcg != "open foraging close to ground"] <- "0"
x$ofcg [x$ofcg == "open foraging close to ground"] <- "1"
```

```
x$fa <- x$Foragingmethod
x$fa [x$fa != "forest ambush"] <- "0"
x$fa [x$fa == "forest ambush"] <- "1"
```

```

x$ah <- x$Foragingmethod
x$ah [x$ah != "perch and aerial hunting"] <- "0"
x$ah [x$ah == "perch and aerial hunting"] <- "1"

x1 <- x[,c(2:10, 13:22)]
x1[ , 1:19] <- as.data.frame(apply(x1[ , 1:19], 2, as.numeric))

## cluster dendrogram

## First we obtain the binary distance Matrix
mat_distb <- dist(x = x1, method = "binary")

## Now, we generate the cluster ##
labs = x$Species
hc_binary_av <- hclust(mat_distb, method = "complete")

## And Finally we plot it ##

plot(hc_binary_av, labels= labs, font=3, main="")

## K-means cluster analysis

library(factoextra)
k16 <- kmeans (x1, centers = 16, nstart = 25)
str (k16)
k16

x1[ , 1:19] <- as.data.frame(apply(x1[ , 1:19], 2, as.numeric))
fviz_cluster(k16, data = x1, repel = T, ggtheme = theme_bw() +
  theme(panel.grid.major = element_blank(),
  panel.grid.minor = element_blank(),
  axis.line = element_line(colour = "black")))

## Bootstrap the results to check for cluster adequacy

library(fpc)
clusters <- 16
groups <- cutree(hc_binary_av, k=clusters)
clus.boot <- clusterboot(x1, B = 1000, clustermethod = hclustCBI,
  method = "ward.D", k = clusters, count = FALSE)
clus.boot$bootmean
x1$hierarchical_clusters <- as.factor(groups)
set.seed(8675309)
AvgJaccard <- clus.boot$bootmean
Instability <- clus.boot$bootbrd/1000
Clusters <- c(1:clusters)
Eval16 <- as.data.frame(cbind(Clusters, AvgJaccard, Instability))
Eval16

```

**Figure S1**

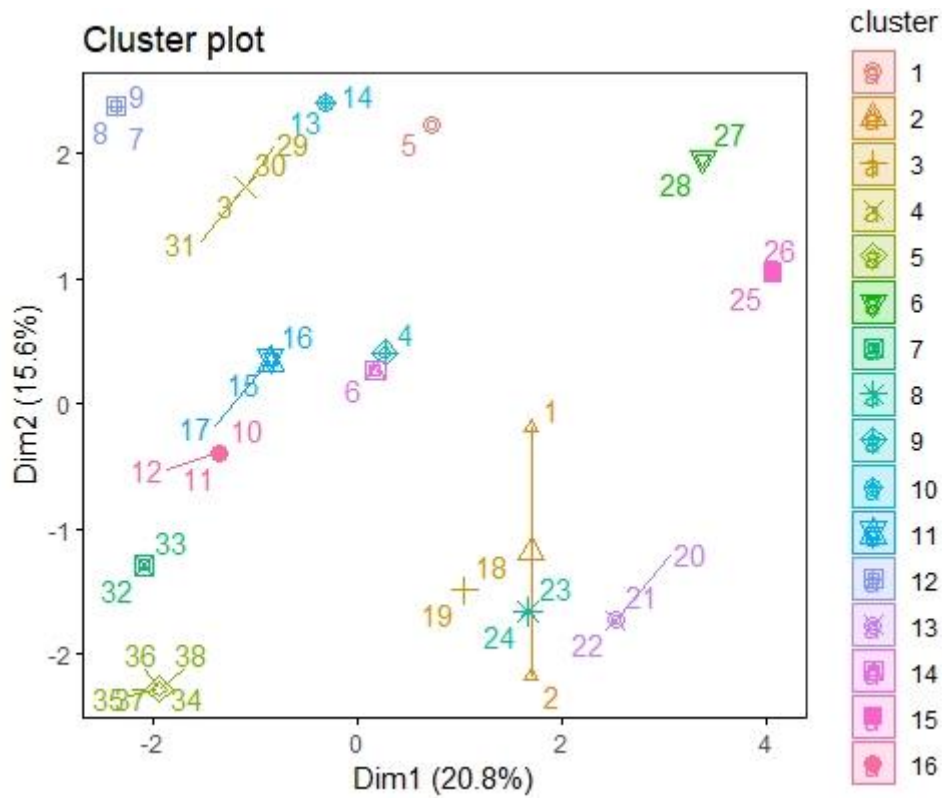

**Figure S1.** Groups resulting from the K-means cluster analysis with 16 centers. Cluster stability (measured as average Jaccard distances) is also included after species names.

**Numbers, species and clusters**

| Number | Species                     | Cluster |
|--------|-----------------------------|---------|
| 1      | <i>Pandion haliaetus</i>    | 1       |
| 2      | <i>Haliaeetus albicilla</i> | 2       |
| 3      | <i>Elanus caeruleus</i>     | 3       |
| 4      | <i>Circaetus gallicus</i>   | 4       |
| 5      | <i>Pernis apivorus</i>      | 5       |
| 6      | <i>Circus aeruginosus</i>   | 6       |
| 7      | <i>Circus pygargus</i>      | 7       |
| 8      | <i>Circus cyaneus</i>       | 7       |
| 9      | <i>Circus macrourus</i>     | 7       |
| 10     | <i>Accipiter gentilis</i>   | 8       |
| 11     | <i>Accipiter brevipes</i>   | 8       |
| 12     | <i>Accipiter nisus</i>      | 8       |
| 13     | <i>Milvus migrans</i>       | 9       |
| 14     | <i>Milvus milvus</i>        | 9       |
| 15     | <i>Buteo buteo</i>          | 10      |
| 16     | <i>Buteo lagopus</i>        | 10      |
| 17     | <i>Buteo rufinus</i>        | 10      |
| 18     | <i>Hieraaetus pennatus</i>  | 11      |
| 19     | <i>Aquila fasciata</i>      | 11      |
| 20     | <i>Aquila chrysaetos</i>    | 12      |

|    |                              |    |
|----|------------------------------|----|
| 21 | <i>Aquila adalberti</i>      | 12 |
| 22 | <i>Aquila heliaca</i>        | 12 |
| 23 | <i>Clanga clanga</i>         | 12 |
| 24 | <i>Clanga pomarina</i>       | 12 |
| 25 | <i>Aegypius monachus</i>     | 13 |
| 26 | <i>Gyps fulvus</i>           | 13 |
| 27 | <i>Gypaetus barbatus</i>     | 14 |
| 28 | <i>Neophron percnopterus</i> | 14 |
| 29 | <i>Falco naumanni</i>        | 3  |
| 30 | <i>Falco vespertinus</i>     | 3  |
| 31 | <i>Falco tinnunculus</i>     | 3  |
| 32 | <i>Falco eleonora</i>        | 15 |
| 33 | <i>Falco subbuteo</i>        | 15 |
| 34 | <i>Falco peregrinus</i>      | 16 |
| 35 | <i>Falco columbarius</i>     | 16 |
| 36 | <i>Falco biarmicus</i>       | 16 |
| 37 | <i>Falco rusticolus</i>      | 16 |
| 38 | <i>Falco cherrug</i>         | 16 |

---

### Cluster Stability

As a rule of thumb, average Jaccard distance < 0.6 indicates cluster is unstable. Average Jaccard distance > 0.85 indicates cluster is highly stable.

| Clusters | Average Jaccard | Instability |
|----------|-----------------|-------------|
| 1        | 0.689           | 0.489       |
| 2        | 0.893           | 0.155       |
| 3        | 0.644           | 0.356       |
| 4        | 0.652           | 0.348       |
| 5        | 0.624           | 0.376       |
| 6        | 0.883           | 0.171       |
| 7        | 0.883           | 0.178       |
| 8        | 0.818           | 0.232       |
| 9        | 0.875           | 0.180       |
| 10       | 0.817           | 0.240       |
| 11       | 0.867           | 0.194       |
| 12       | 0.800           | 0.257       |
| 13       | 0.833           | 0.215       |
| 14       | 0.830           | 0.214       |
| 15       | 0.820           | 0.235       |
| 16       | 0.919           | 0.093       |

---

Figure S2

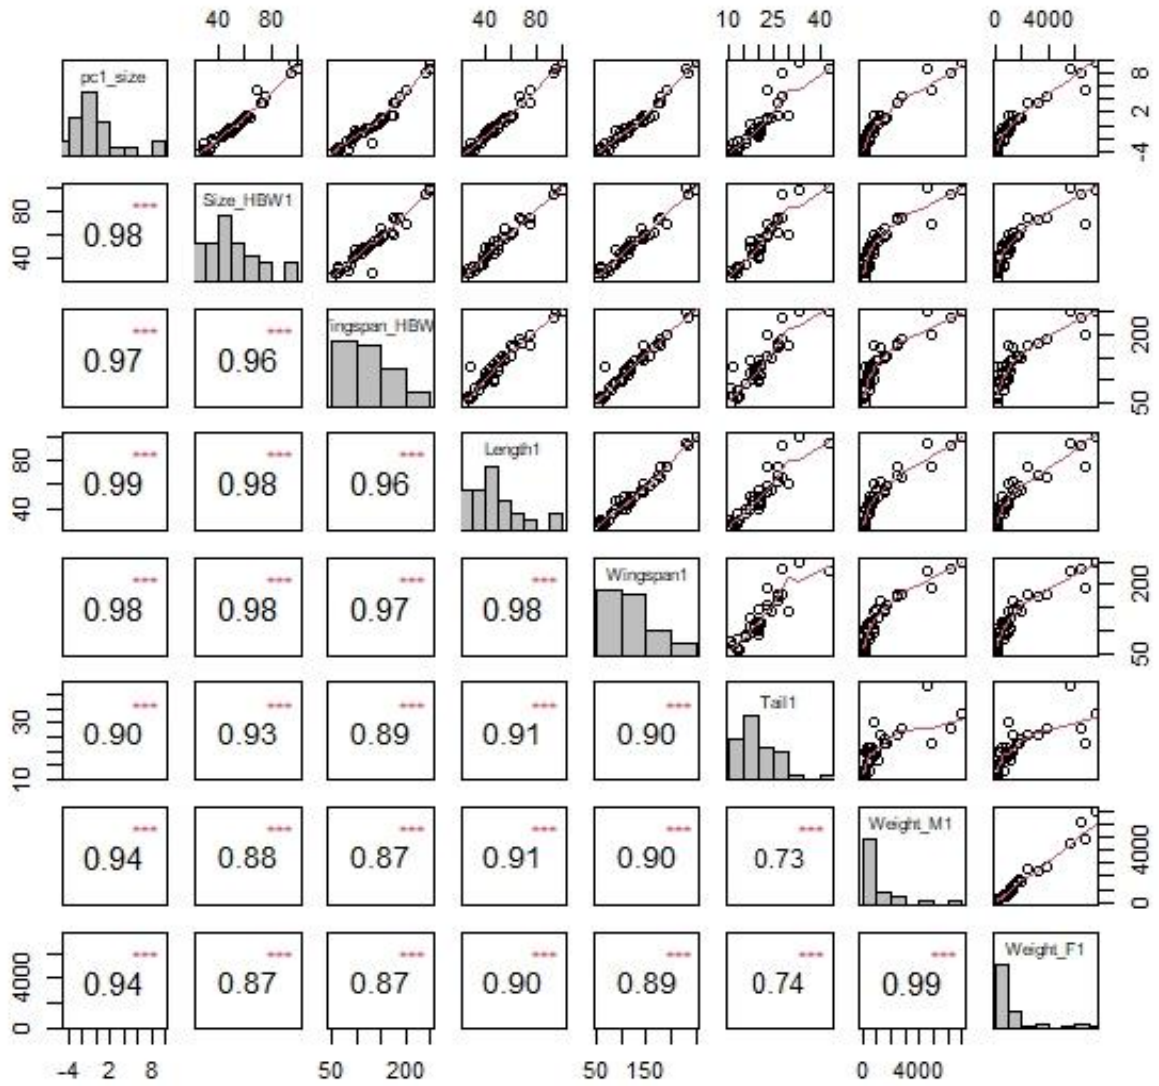

**Figure S2.** Pairwise correlations of the first principal component (body size index) and seven morphometric variables (i.e. those representing the lower ranges of each morphometric). Black numbers indicate Pearson correlation coefficients and red stars indicate if the correlation is highly significant ( $*** < 0.001$ ).



**Figure S3**

**Group 1:** *Haliaeetus albicilla* (left) by J.J. Negro. *Pandion haliaetus* (right) by J.A. Irastorza.

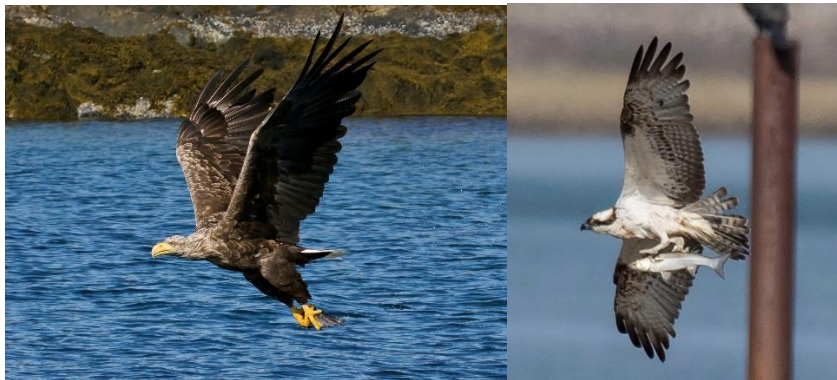

**Group 2:** *Circus macrourus* (left) by J.J. Negro. *C. pygargus* (center) by J.J. Negro. *C. cyaneus* (right) by B. Rodríguez.

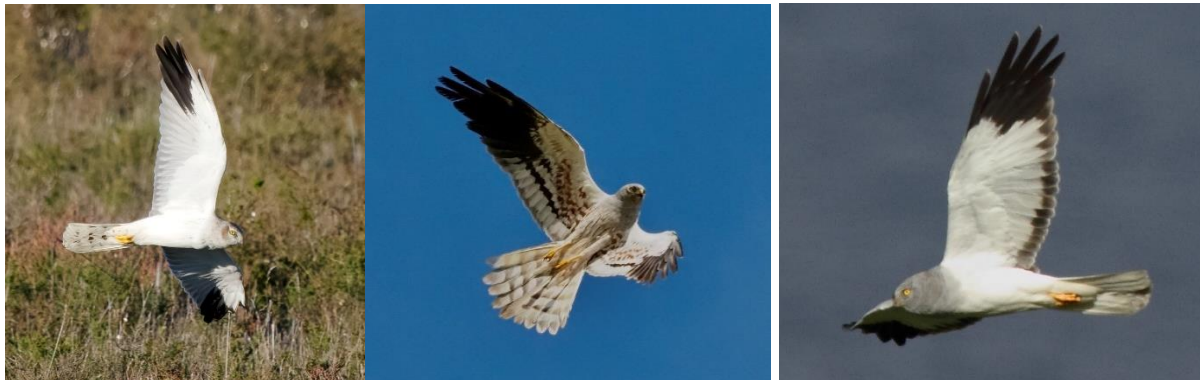

**Group 3:** *Accipiter gentilis* (left) and *A. nisus* (center) by M. Cayuela. *A. brevipes* (right) by V. Y. Arkhipov (Creative Commons).

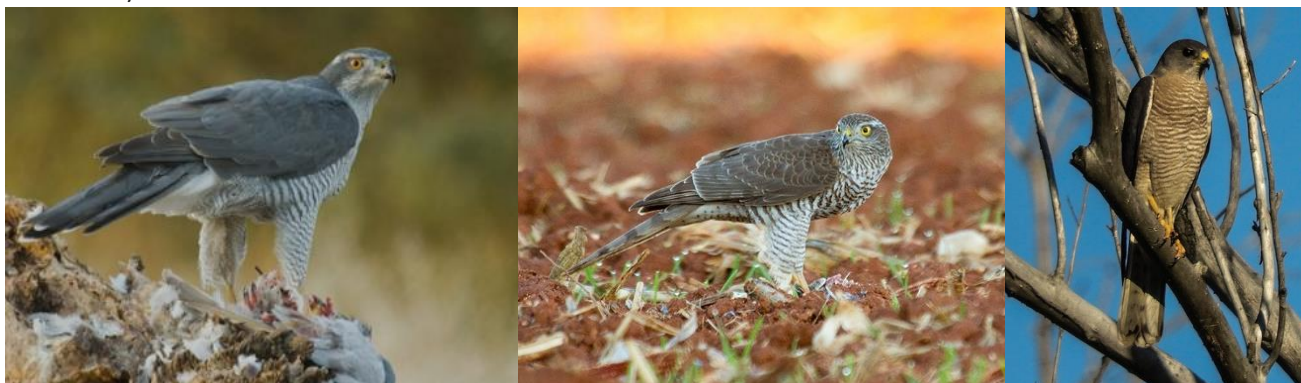

**Group 4:** *Milvus milvus* (left) and *M. migrans* by J.J. Negro.

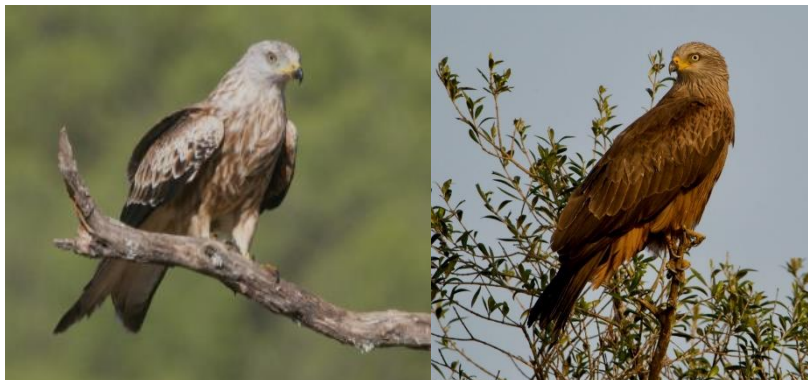



**Group 5:** *Buteo lagopus* (left) by M. Szczepanek (Creative Commons). *B. buteo* (center) by E.J. Rodríguez-Rodríguez. *B. rufinus* (right) by K. Koshy (Creative Commons).

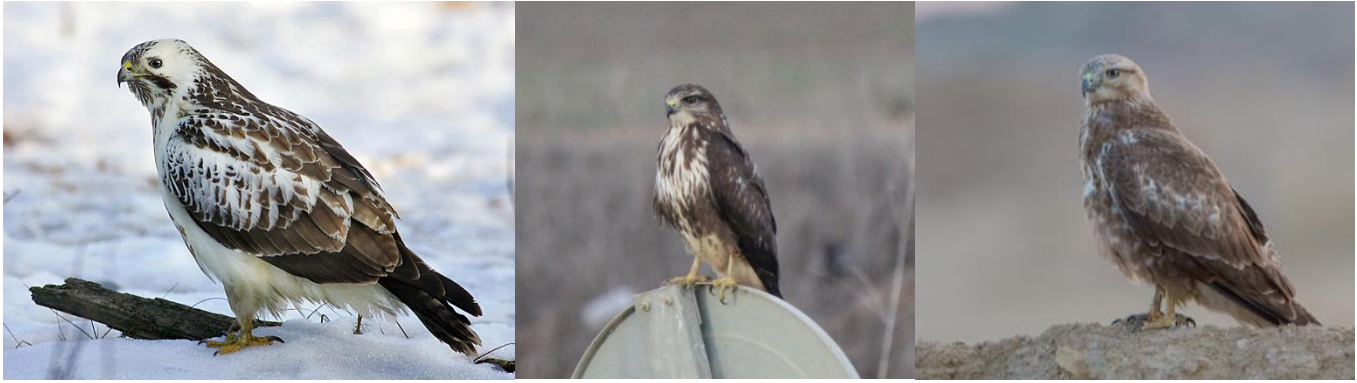

**Group 6:** *Aquila fasciata* (left) by J.A. Irastorza. *Hieraetus pennatus* (right) by J.J. Negro.

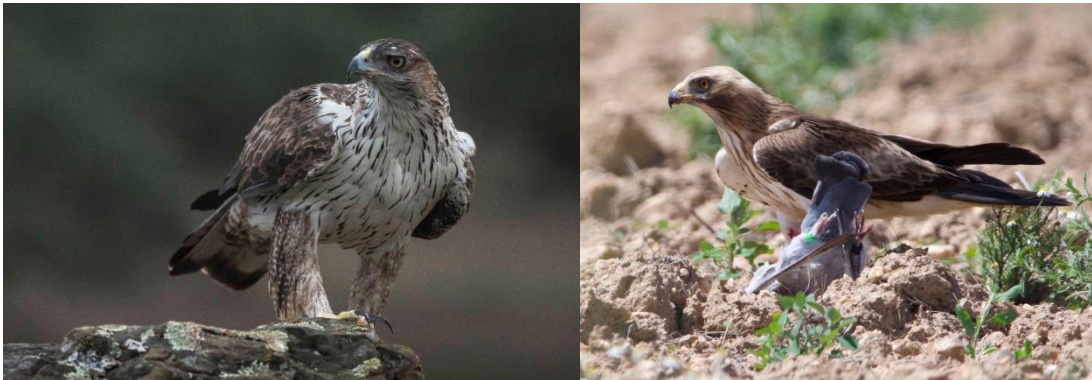

**Group 7:** *Aquila chrysaetos* (left) and *A. adalberti* (center) by J.J.Negro. *A. heliaca* (right) by A. Kovacs.

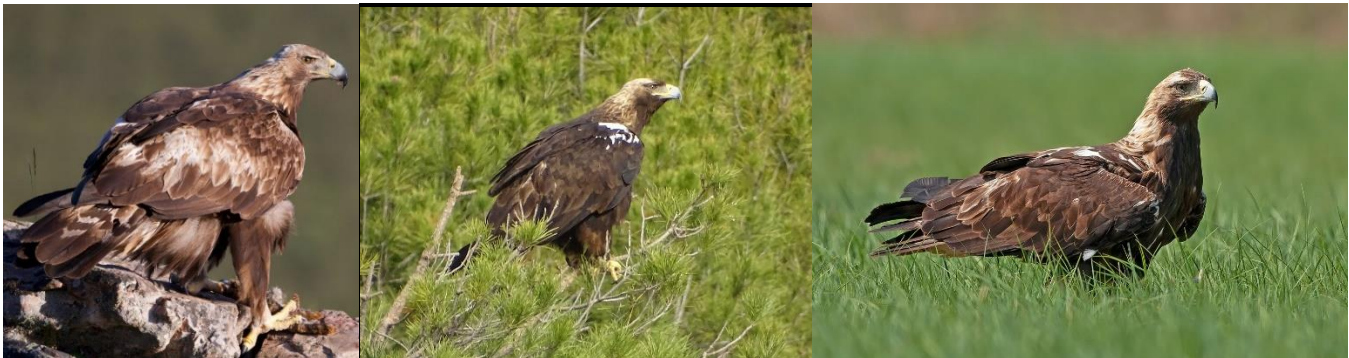

**Group 8:** *Clanga clanga* (left) by A. Kovacs. *C. pomarina* (right) by W. Avnerunder (Creative Commons). Juvenile plumage (both).

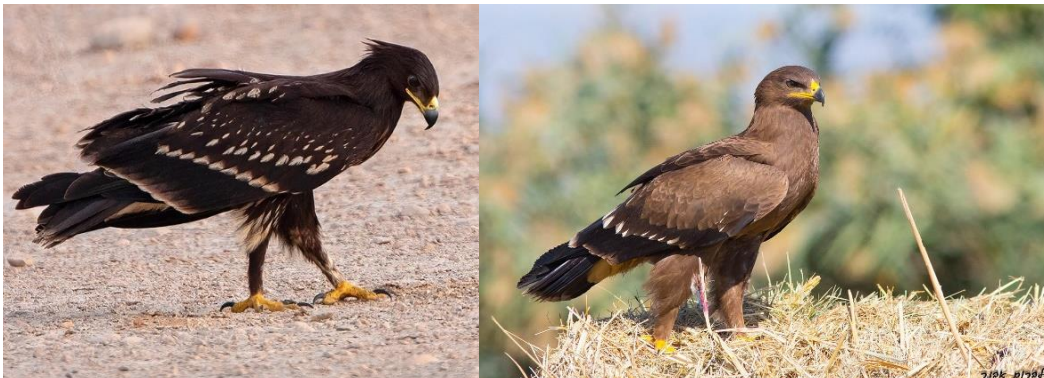



**Group 9:** *Gyps fulvus* (left and center) and *Aegyptus monachus* (right) by J.J. Negro.

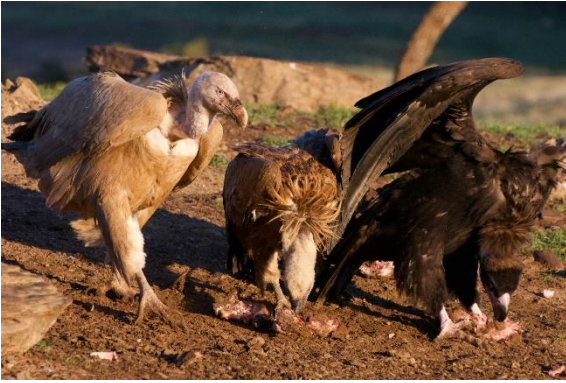

**Group 10:** *Gypaetus barbatus* (left) and *Neophron percnopterus* (right) by J.J. Negro.

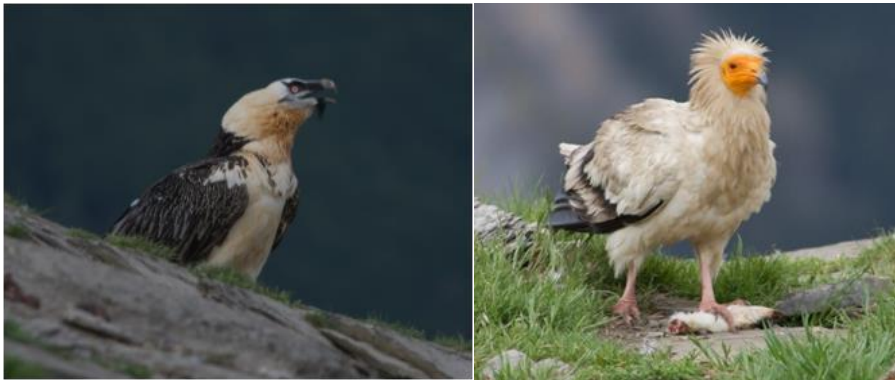

**Group 11:** *Falco eleonora* (left) by B. Rodríguez. *F. subbuteo* (right) by J.J. Negro.

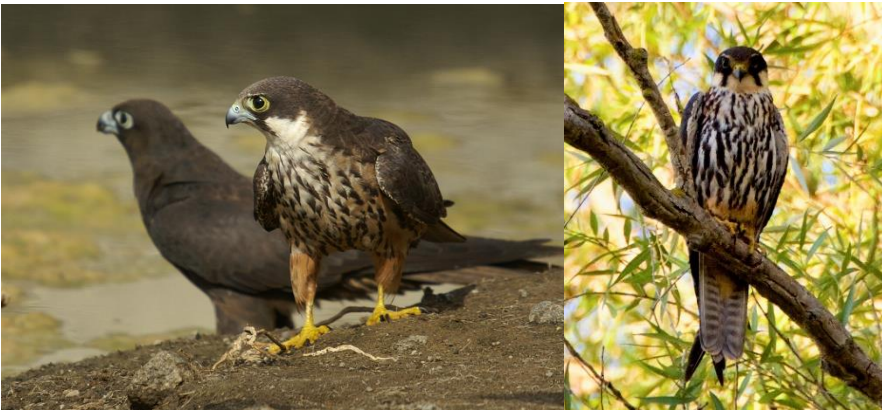

**Group 12:** *Falco rusticolus* (left) by NorthernLight (Creative Commons). *F. cherrug* (center) by B. Rodríguez. *F. peregrinus* (right) by J.M. Sayago. *F. biarmicus* (right second row) by D. Keats (Creative Commons). *F. columbarius* by J.J. Negro.

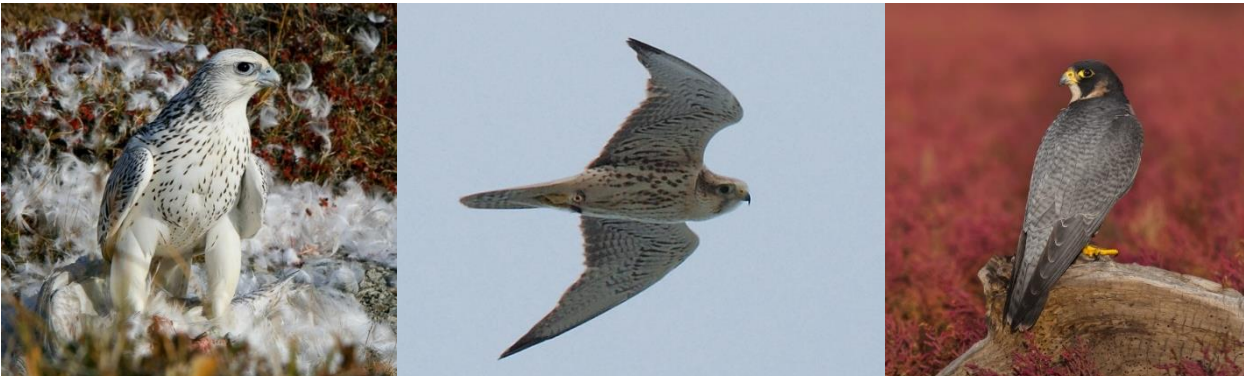

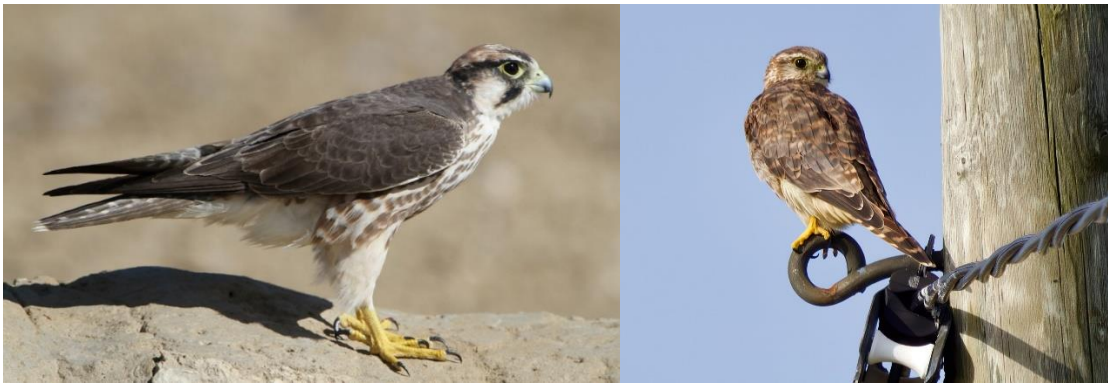

**Group 13:** *Falco tinnunculus* (left) and *F. naumanni* (center) by J.J. Negro. *F. vespertinus* (right) by B. Rodríguez.

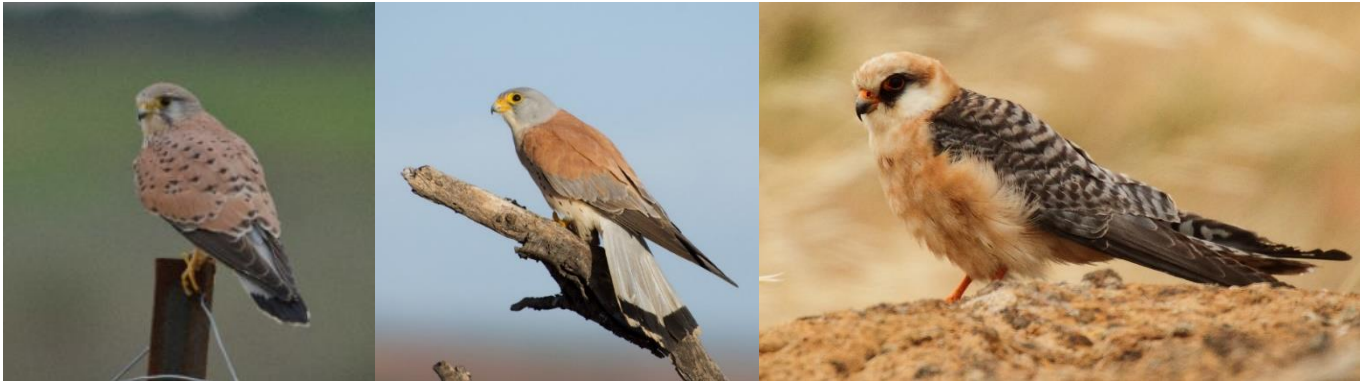

**Figure S3.** European raptors grouped according to trophic niche and phylogenetic relationships to show morphological and plumage similarities.

#### Creative Commons attributions

-*Accipiter brevipes* by Vladimir Yu. Arkhipov (<https://commons.wikimedia.org/wiki/Special:Contributions/Arkhipov>) under CC BY\_SA 4.0 (<https://creativecommons.org/licenses/by-sa/4.0/deed.en>)

-*Buteo lagopus* by Marek Szczepanek ([https://commons.wikimedia.org/wiki/User:Pkuczynski/Marek\\_Szczepanek](https://commons.wikimedia.org/wiki/User:Pkuczynski/Marek_Szczepanek)) under CC BY\_SA 3.0 (<https://creativecommons.org/licenses/by-sa/3.0/legalcode>)

-*Buteo rufinus* by Koshy Koshy (<https://www.flickr.com/people/97235261@N00>) under CC BY 2.0 (<https://creativecommons.org/licenses/by/2.0/legalcode>)

-*Clanga pomarina* by Wolbrun Avner (Creative Commons Attribution-ShareAlike 4.0 International)

-*Falco rusticolus* by NorthernLight (<https://de.wikipedia.org/wiki/Benutzer:NorthernLight>) under CC BY\_SA 3.0 (<https://creativecommons.org/licenses/by-sa/3.0/legalcode>)

-*Falco biarmicus* by Derek Keats (<https://www.flickr.com/people/93242958@N00>) ([https://es.wikipedia.org/wiki/Falco\\_biarmicus#/media/Archivo:Lanner\\_falcon,\\_Falco\\_biarmicus,\\_at\\_Kgalagadi\\_Transfronter\\_Park,\\_Northern\\_Cape,\\_South\\_Africa\\_\(34447024731\).jpg](https://es.wikipedia.org/wiki/Falco_biarmicus#/media/Archivo:Lanner_falcon,_Falco_biarmicus,_at_Kgalagadi_Transfronter_Park,_Northern_Cape,_South_Africa_(34447024731).jpg)) under CC BY 2.0 (<https://creativecommons.org/licenses/by/2.0/legalcode>)
